# Supplementary material for: A Bivalent Live-Attenuated Vaccine for the Prevention of Equine Influenza Virus
Source: PubMed Central journal article supplement (PMC6832603; doi:10.3390/v11100933), 2019-10-11

**Supplementary Figure 1. Nucleotide alignment of clade 1 Ohio/03 and clade 2 Rich/07 HA proteins:** In red are indicated the amino acid residues that differ between the two viruses present in the EIV bivalent LAIV. Residue numbers are indicated at the right as reference.

|         |                         |                          |            |                         |                         |                         |                         |                         |       |
|---------|-------------------------|--------------------------|------------|-------------------------|-------------------------|-------------------------|-------------------------|-------------------------|-------|
| Ohio/03 | ATGAAGACAA              | CCATTATTTT               | G*****ATA  | CTACTGACCC              | ATTGGGCCTA              | CAGTCAAAAC              | CCAATCAGTG              | GCAACAACAC              | 74    |
| Rich/07 | ATGAAGACAA              | CCATTATTTT               | TATTTTATA  | CTACTGACCC              | ATTGGGCCTA              | CAGTCAAAAC              | CCAATCAGTA              | ACAACAACAC              | 80    |
| Ohio/03 | AGCCACATTG              | TGTCTGGGAC               | GCCATGCAGT | AGCAAATGGA              | ACATTGGTAA              | AAACAATAAG              | TGATGATCAA              | ATTGAGGTGA              | 154   |
| Rich/07 | AGCCACATTG              | TGTCTGGGAC               | ACCATGCAGT | AGCAAATGGA              | ACATTAGTAA              | AAACAATAAG              | TGATGATCAA              | ATTGAGGTGA              | 160   |
| Ohio/03 | CAAATGCTAC              | AGAATTAGTT               | CAGAGCATTT | CAACGGGGAA              | AATATGCAAC              | AACTCATATA              | GAATTCTAGA              | TGGAAGAAAT              | 234   |
| Rich/07 | CAAATGCTAC              | AGAATTAGTT               | CAGAGCATTT | CAATGGGGAA              | AATATGCAAC              | AACTCATATA              | GAATTCTAGA              | TGGAAGAAAT              | 240   |
| Ohio/03 | TGCACATTAA              | TAGATGCAAT               | GCTAGGAGAC | CCCCACTGTG              | ACGCTTTTCA              | GTATGAGAAT              | TGGGACCTCT              | TTATAGAAAG              | 314   |
| Rich/07 | TGCACATTAA              | TAGATGCAAT               | GCTAGGAGAC | CCCCACTGTG              | ACGTCTTTCA              | GTATGAGAAT              | TGGGACCTCT              | TTATAGAAAG              | 320   |
| Ohio/03 | AAGCAGCGCT              | TTCAGCAATT               | GCTACCCATA | TGACATCCCT              | GACTATGCAT              | CGCTCCGATC              | CATTGTAGCA              | TCCTCAGGAA              | 394   |
| Rich/07 | AAGCAGCGCT              | TTCAGCAATT               | GCTACCCATA | TGACATCCCT              | GACTATGCAT              | CGCTCCGATC              | AATTGTAGCA              | TCCTCAGGAA              | 400   |
| Ohio/03 | CATTGGAATT              | CACAGCAGAG               | GGATTACAT  | GGACAGGTGT              | CACTCAAAAC              | GGAA <del>T</del> AAGTG | GAGCCTGCAA              | AAGGGGATCA              | 474   |
| Rich/07 | CATTGGAATT              | CACAGCAGAG               | GGATTACAT  | GGACAGGTGT              | CACTCAAAAC              | GGAA <del>G</del> AAGTG | GAGCCTGCAA              | AAGGGGATCA              | 480   |
| Ohio/03 | GCCGATAGTT              | TCTTTAGCCG               | ACTGAATTGG | CTAACAAAAT              | CTGGAA <del>G</del> CTC | TTA <del>C</del> CCCACA | TTGAATGTGA              | CAATGCCTAA              | 554   |
| Rich/07 | GCCGATAGTT              | TCTTTAGCCG               | ACTGAATTGG | CTAACAAAAT              | CTGGAA <del>A</del> CTC | TTA <del>T</del> CCCACA | TTGAATGTGA              | CAATGCCTAA              | 560   |
| Ohio/03 | CAATAAAAAT              | TTCGACAAGC               | TATACATCTG | GGGGATTCAT              | CACCCGAG <del>C</del> T | CAAATCAAGA              | GCAGACAAAA              | TTGTACATCC              | 634   |
| Rich/07 | CAATAAAAAT              | TTCGACAAGC               | TATACATCTG | GGGGATTCAT              | CACCCGAG <del>T</del> T | CAAATCAAGA              | GCAGACAAAA              | TTGTATATCC              | 640   |
| Ohio/03 | AAGAATCAGG              | ACGAGTAACA               | GTCTCAACAA | AAAGAAGTCA              | ACAAACAATA              | ATCCCTAACA              | TCGGATCTAG              | ACCGTGGGTC              | 714   |
| Rich/07 | AAGAATCAGG              | ACGAGTAACA               | GTCTCAACAA | AAAGAAGTCA              | ACAAACAATA              | ATCCCTAACA              | TCGGATCTAG              | ACCGTGGGTC              | 720   |
| Ohio/03 | AGAGGTCAAT              | CAGGCAGGAT               | AAGCATATAC | TGGACCATTG              | TAAAACCTGG              | AGATATCCTA              | ATGATAAACA              | GTAATGGCAA              | 794   |
| Rich/07 | AGAGGTCAAT              | CAGGCAGGAT               | AAGCATATAC | TGGACCATTG              | TAAAACCTGG              | AGATATCCTA              | ATGATAAACA              | GTAATGGCAA              | 800   |
| Ohio/03 | CTTAGTTGCA              | CCGCGGGGAT               | ATTTTAAATT | GAAAACAGGG              | AAAAGCTCTG              | TAATGAGATC              | AGATGTACCC              | ATAGA <del>A</del> ATT  | 874   |
| Rich/07 | CTTAGTTGCA              | CCGCGGGGAT               | ATTTTAAATT | GAAAACAGGG              | AAAAGCTCTG              | TAATGAGATC              | AGATGTACCC              | ATAGAC <del>A</del> ATT | 880   |
| Ohio/03 | GTGTGTCTGA              | ATGTATTACA               | CCAAATGGAA | GCATCTCCAA              | CGA <del>C</del> AAGCCA | TTCCAAAATG              | TGA <del>C</del> AAAAGT | TACATATGGA              | 954   |
| Rich/07 | GTGTGTCTGA              | ATGTATTACA               | CCAAATGGAA | GCATCTCCAA              | CGA <del>A</del> AAGCCA | TTCCAAAATG              | TAA <del>C</del> AAAAGT | TACATATGGA              | 960   |
| Ohio/03 | AAATGCCCCA              | AGTATATCAG               | GCAAAACACT | TTAAAG <del>C</del> TGG | CCACTGGGAT              | GAGGAATGTA              | CCAGAAAAGC              | AAATCAGAGG              | 1,034 |
| Rich/07 | AAATGCCCCA              | AA <del>T</del> TATATCAG | GCAAAACACT | TTAAAG <del>T</del> TGG | CCACTGGAA <del>T</del>  | GAGAAATGTA              | CCAGAAAAGC              | AAATCAGAGG              | 1,040 |
| Ohio/03 | AATCTT <del>C</del> GGA | GCAATAGCGG               | GATTCATCGA | AAACGGCTGG              | GAAGGAATGG              | TTGATGGGTG              | GTATGGGTTC              | CGATA <del>T</del> CAAA | 1,114 |
| Rich/07 | AATCTT <del>T</del> GGG | GCAATAGCGG               | GATTCATCGA | AAACGGCTGG              | GAAGGAATGG              | TTGATGGGTG              | GTATGGGTTC              | CGATA <del>C</del> CAA  | 1,120 |
| Ohio/03 | ACTCTGAAGG              | AACAGG <del>G</del> CAA  | GCTGCAGATC | TAAAGAGCAC              | TCAA <del>G</del> CAGCC | ATCGACCAGA              | TTAATG <del>G</del> AAA | GTTAAACAGA              | 1,194 |
| Rich/07 | ACTCTGAAGG              | AACAGG <del>A</del> CAA  | GCTGCAGATC | TAAAGAGCAC              | TCAA <del>A</del> CAGCC | ATCGACCAGA              | TTAATG <del>A</del> AAA | GTTAAACAGA              | 1,200 |
| Ohio/03 | GTGATTGAAA              | GAACCAATGA               | GAAATTCAT  | CA <del>A</del> ATAGAGA | AGGAATTCTC              | AGAAGTAGAA              | GGAAGAATTC              | AGGACTTGG               | 1,274 |
| Rich/07 | GTGATTGAAA              | GAACCAATGA               | AAAATTCAT  | CAGATAGAGA              | AGGAATTCTC              | AGAAGTAGAA              | GGAAGAATTC              | AGGACTTGG               | 1,280 |
| Ohio/03 | GAAATATGTA              | GAAGACACCA               | AAATAGACCT | ATGGTCTTAC              | AATGCAGAAAT             | TGCTGGTGGC              | TCTAGAAAAT              | CAACATACAA              | 1,354 |
| Rich/07 | GAAATATGTG              | GAAGACACCA               | AAATAGACCT | ATGGTCTTAC              | AATGCAGAAAT             | TGCTGGTGGC              | TCTAGAAAAT              | CAACATACAA              | 1,360 |
| Ohio/03 | TTGACTTAAC              | AGATGCAGAA               | ATGAATAAAT | TATTTGAGAA              | GACTAGACGC              | CAGTTAAGAG              | AAAACGCAGA              | AGACATGGGA              | 1,434 |
| Rich/07 | TTGACTTAAC              | AGATGCAGAA               | ATGAATAAAT | TATTCGAGAA              | GACTAGACGC              | CAGTTAAGAG              | AAAACGCAGA              | AGACATGGGA              | 1,440 |
| Ohio/03 | GGTGGATGTT              | TCAAGATTTA               | CCACAAATGT | GATAATGCAT              | GCATTGGATC              | AATAAGAAAT              | GGGACATATG              | ACCATTACAT              | 1,514 |
| Rich/07 | GGTGGATGTT              | TCAAGATTTA               | CCACAAATGT | GATAATGCAT              | GCATTGGATC              | AATAAGAAAT              | GGGACATATG              | ACCATTACAT              | 1,520 |
| Ohio/03 | ATACAGAGAT              | GAAGCATTAA               | ACAACCGATT | TCAGATCAAA              | GGTGTAGAGT              | TGAAATCAGG              | CTACAAAGAT              | TGGATACTGT              | 1,594 |
| Rich/07 | ATACAGAGAT              | GAAGCATTAA               | ACAACCGATT | TCAAATCAAA              | GGTGTGAGT               | TGAAATCAGG              | CTACAAAGAT              | TGGATACTGT              | 1,600 |
| Ohio/03 | GGATTT <del>C</del> ATT | CGCCATATCA               | TGCTTCTTAA | TTTGCCTTGT              | TCTATTGGGT              | TT <del>C</del> ATTATGT | GGGCTTGCCA              | AAAAGGCAAC              | 1,674 |
| Rich/07 | GGATTT <del>T</del> ATT | CGCCATATCA               | TGCTTCTTAA | TTTGCCTTGT              | TCTATTGGGT              | TT <del>T</del> ATTATGT | GGGCTTGCCA              | AAAAGGCAAC              | 1,680 |
| Ohio/03 | ATCAGATGCA              | ACATTTGCAT               | TTGA       | 1,698                   |                         |                         |                         |                         |       |
| Rich/07 | ATCAGATGCA              | ACATTTGCAT               | TTGA       | 1,708                   |                         |                         |                         |                         |       |

**Supplementary Figure 2. Nucleotide alignment of clade 1 Ohio/03 and clade 2 Rich/07 NA proteins:** In red are indicated the amino acid residues that differ between the two viruses present in the EIV bivalent LAIV. Residue numbers are indicated at the right as reference.

|         |            |             |            |             |             |            |             |            |       |
|---------|------------|-------------|------------|-------------|-------------|------------|-------------|------------|-------|
| Ohio/03 | ATGAATCCAA | ATCAAAAAGAT | AATAGCAATT | GGATTTGCAT  | CATTGGGGAT  | ATTAATCATT | AATGTCATTC  | TCCATGTAGT | 80    |
| Rich/07 | ATGAATCCAA | ATCAAAAAGAT | AATAACAATT | GGATCTGCAT  | CATTGGGGAT  | ATTAATCATT | AACGTCATTC  | TCCATGTAGT |       |
| Ohio/03 | CAGCATTATA | GTAACAGTAC  | TGGTCCTCAA | TAACAATGAA  | ACAGATCTGA  | ACTGCAAAGG | GACGATCATA  | AGAGAGTGCA | 160   |
| Rich/07 | CAGCATTATA | GTAACAGTAC  | TGGTCCTCAA | TAACAATAGA  | ACAGGTCTGA  | ACTGCAAAGG | GACGATCATA  | AGAGAGTACA |       |
| Ohio/03 | ATGAAACAGT | AAGAGTAGAA  | AAAATTACTC | AATGGTATAA  | TACCAGTACA  | ATTAAGTACA | TAGAGAGACC  | TTCAAATGAA | 240   |
| Rich/07 | ATGAAACAGT | AAGAGTAGAA  | AAAATTACTC | AATGGCATAA  | TACCAGTGCA  | ATTAAGTACA | TAGAGAGACC  | TCAAATGAA  |       |
| Ohio/03 | TACTACATGA | ACAACACTGA  | ACTACTTTGT | GAGGCCAAG   | GCTTTGCACC  | ATTTTCCAAA | GATAATGGAA  | TACGAATTGG | 320   |
| Rich/07 | TACTACATGA | ACAACACCGA  | ACCACTTTGT | GAGGCCAAG   | GCTTTGCACC  | ATTTTCCAAA | GATAATGGAA  | TACGAATTGG |       |
| Ohio/03 | GTCGAGAGGC | CATGTTTTTG  | TGATAAGAGA | ACCTTTTGTA  | TCATGTTTCGC | CCTCAGAATG | TAGAACCTTT  | TTCCTCACAC | 400   |
| Rich/07 | GTCGAGAGGC | CATGTTTTTG  | TGATAAGAGA | ACCTTTTGTA  | TCATGTTTCGC | CCTCAGAATG | TAGAACCTTT  | TTCCTCACAC |       |
| Ohio/03 | AGGGCTCATT | ACTCAATGAC  | AAACATTCTA | ACGGCACAGT  | AAAGGACCGA  | AGTCCGTATA | GGACTTTGAT  | GAGTGTCAGA | 480   |
| Rich/07 | AGGGCTCATT | ACTCAATGAC  | AAACATTCTA | ACGGCACAGT  | AAAGGATCGA  | AGTCCATATA | GGACTTTGAT  | GAGTGTCAA  |       |
| Ohio/03 | ATAGGGCAAT | CACCTAATGT  | ATATCAAGCT | AGGTTTGAAT  | CGGTAGCATG  | GTCAGCAACA | GCATGCCATG  | ATGGAAAAA  | 560   |
| Rich/07 | ATAGGGCAAT | CACCTAATGT  | GTATCAAGCT | AGGTTTGAAT  | CGGTGGCATG  | GTCAGCAACA | GCATGCCATG  | ATGGAAAAA  |       |
| Ohio/03 | ATGGATGACA | GTTGGAGTCA  | CAGGGCCCGA | CAATCAAGCA  | ATTGCAGTAG  | TGAACTATGG | AGGTGTTCCG  | GTTGATATTA | 640   |
| Rich/07 | ATGGATGACA | ATTGGAGTCA  | CAGGGCCCGA | CAATCAAGCA  | ATTGCAGTAG  | TGAACTATGG | GGGTGTTCCG  | GTTGATATTA |       |
| Ohio/03 | TTAATTCATG | GGCAGGGGAT  | ATTTTAAGAA | CCCAAGAATC  | ATCATGCACC  | TGCATTAAAG | GAGACTGTTA  | TTGGGTAATG | 720   |
| Rich/07 | TTAATTCATG | GGCAGGGGAC  | ATCTTAAGAA | CCCAAGAATC  | ATCATGCACC  | TGCATTAAAG | GAAACTGTTA  | TTGGGTAATG |       |
| Ohio/03 | ACTGATGGAC | CGGCAAATAG  | GCAAGCTAAA | TATAGAAATAT | TCAAAGCAAA  | AGATGGAAGA | GTAATTGGAC  | AGACTGATAT | 800   |
| Rich/07 | ACTGATGGAC | CGGCAAATAG  | GCAAGCTAAA | TATAGGATAT  | TCAAAGCAAA  | AGATGGAAGA | GTAATTGGAC  | AGACTGATAT |       |
| Ohio/03 | AAGTTTCAAT | GGGGGACACA  | TAGAGGAGTG | TTCTTGTTAC  | CCCAATGAAG  | GGAAGGTGGA | ATGCATATGC  | AGGGACAATT | 880   |
| Rich/07 | AAGCTTCAAT | GGGGGACACA  | TAGAGGAGTG | TTCTTGTTAC  | CCCAATGAAG  | GGAAGGTGGA | ATGCATATGC  | AGGGACAATT |       |
| Ohio/03 | GGACTGGAAC | AAATAGACCA  | ATTCTGGTAA | TATCTTCTGA  | TCTATCGTAC  | ACAGTTGGA  | TATTTGTGTGC | TGGCATTCCC | 960   |
| Rich/07 | GGACTGGAAC | AAATAGACC   | AATCTGGTAA | TATCTTCTGA  | TCTATCGTAC  | ACAGTTGGA  | TATTTGTGTGC | TGGCATTCCC |       |
| Ohio/03 | ACTGACACTC | CTAGGGGAGA  | GGATAGTCAA | TTCACAGGCT  | CATGTACAAG  | TCCTTTGGGA | AATAAAGGAT  | ACGGTGTAAA | 1,040 |
| Rich/07 | ACTGACACTC | CTAGGGGAGA  | GGATAGTCAA | TTCACAGGCT  | CATGTACAAG  | TCCTTTGGGA | AATAAAGGAT  | ACGGTGTAAA |       |
| Ohio/03 | AGGTTTCGGG | TTTCGACAAG  | GAACTGACGT | ATGGGCCGGA  | AGGACAATTA  | GTAGGACTTC | AAGATCAGGA  | TTCGAAATAA | 1,120 |
| Rich/07 | AGGTTTCGGG | TTTCGACAAG  | GAACTGACGT | ATGGGCCGGA  | AGGACAATTA  | GTAGGACTTC | GAGATCAGGA  | TTCGAAATAA |       |
| Ohio/03 | TAAAAATCAG | GAATGGTTGG  | ACACAGAACA | GTAAGACCA   | AATCAGGAGG  | CAAGTGATTA | TCGATGACCC  | AAATTGGTCA | 1,200 |
| Rich/07 | TAAAAATCAG | GAATGGTTGG  | ACACAGAACA | GTAAGACCA   | AATCAGGAGG  | CAAGTGATTA | TCGATGACCC  | AAATTGGTCA |       |
| Ohio/03 | GGATATAGCG | GTTCTTTCAC  | ATTGCCGTT  | GAACTAACAA  | AAAAGGGATG  | TTTGGTCCCC | TGTTTCTGGG  | TTGAAATGAT | 1,280 |
| Rich/07 | GGATATAGCG | GTTCTTTCAC  | ATTGCCGATT | GAACTAACAA  | AAAAGGGATG  | TTTGGTCCCC | TGTTTCTGGG  | TTGAAATGAT |       |
| Ohio/03 | TAGAGGTAAA | CCTGAAGAAA  | CAACAATATG | GACCTCTAGC  | AGCTCCATTG  | TGATGTGTGG | AGTAGATCAT  | AAAATTGCCA | 1,360 |
| Rich/07 | TAGAGGTAAA | CCTGAAGAAA  | CAACAATATG | GACCTCTAGC  | AGCTCCATTG  | TGATGTGTGG | AGTAGATCAT  | AAAATTGCCA |       |
| Ohio/03 | GTTGGTCATG | GCACGATGGA  | GCTATTCTTC | CCTTTGACAT  | CGATAAGATG  | TAA        | 1,413       |            |       |
| Rich/07 | GTTGGTCATG | GCACGATGGA  | GCTATTCTTC | CCTTTGACAT  | CGATAAGATG  | TAA        |             |            |       |

Supplementary Figure 3. Correlation between HAI titers (Figure 7) and clinical scores (Figure 8) at day 7 after challenge with Clade 1 KY/14 (A) and Clade 2 Rich/07 (B) WT viruses.

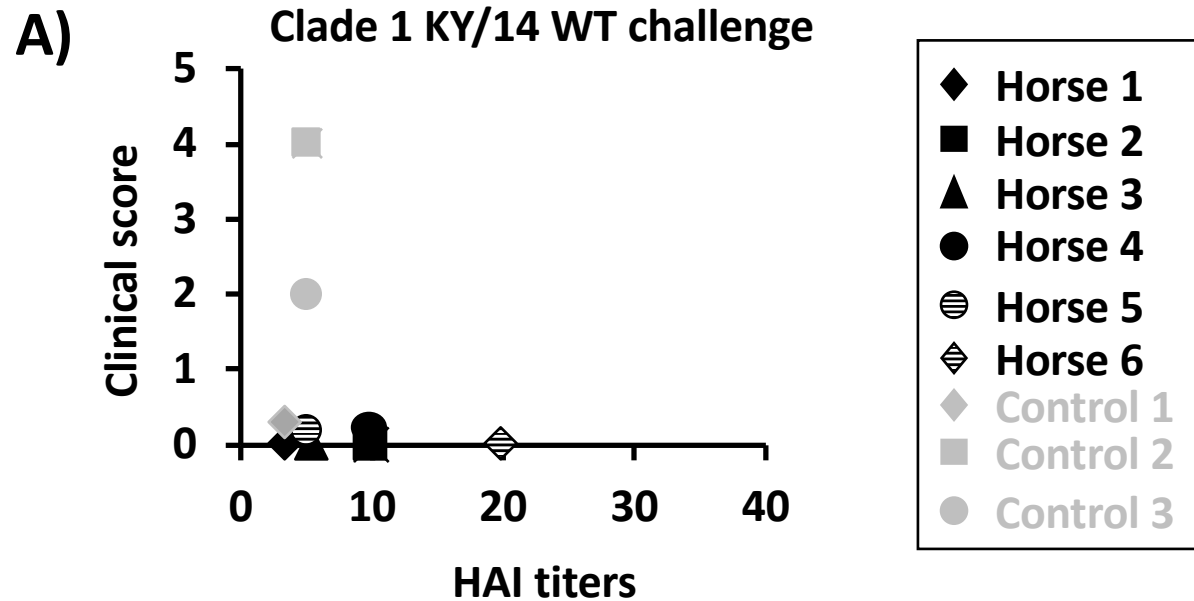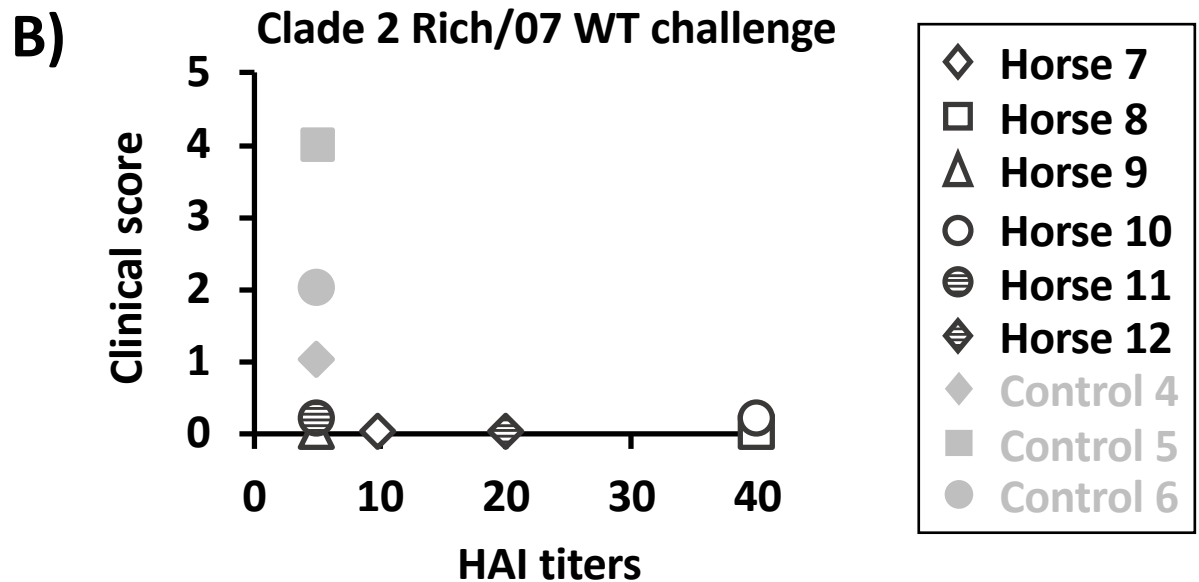

Supplement: viruses-11-00933-s001.pdf [file viruses-11-00933-s001.pdf]
